# Supplementary material for: Synthesis and In Vitro Evaluation of Caffeoylquinic Acid Derivatives as Potential Hypolipidemic Agents
Source: PubMed Central journal article supplement (PMC6429172; doi:10.3390/molecules24050964), 2019-03-09
Supplement: molecules-24-00964-s001.pdf [file molecules-24-00964-s001.pdf]

# Synthesis and *in vitro* evaluation of caffeoylquinic acids derivatives as potential hypolipidemic agents

Yu Tian<sup>1,†</sup>, Xiao-xue Cao<sup>1,†</sup>, Hai Shang<sup>1</sup>, Chong-ming Wu<sup>1</sup>, Xi Zhang<sup>2</sup>, Peng Guo<sup>1,\*</sup>, Xiao-po Zhang<sup>3,\*</sup>, and Xu-Dong Xu<sup>1,\*</sup>

- <sup>1</sup> Beijing Key Laboratory of Innovative Drug Discovery of Traditional Chinese Medicine (Natural Medicine) and Translational Medicine; Key Laboratory of Bioactive Substances and Resources Utilization of Chinese Herbal Medicine, Ministry of Education; Key Laboratory of Efficacy Evaluation of Chinese Medicine against Glycolipid Metabolic Disorders, State Administration of Traditional Chinese Medicine; Zhong guan cun Open Laboratory of the Research and Development of Natural Medicine and Health Products; Key Laboratory of new drug discovery based on Classic Chinese medicine prescription; Institute of Medicinal Plant Development, Chinese Academy of Medical Sciences & Peking Union Medical College, Beijing 100193, P. R. China; ytian@implad.ac.cn (Y.T.); snow2018cxx@163.com (X.-X.C.); hshang@implad.ac.cn (H.S.); cmwu@implad.ac.cn (C.-M.W.)
- <sup>2</sup> Center of Research and Development on Life Sciences and Environment Sciences, Harbin University of Commerce, Harbin 150076, P. R. China; 18800467885@163.com (X.Z.)
- <sup>3</sup> School of Pharmacy, Hainan Medical University, Haikou 571199, P. R. China
- † These authors contributed equally to this work.
- \* Correspondence: pguo@implad.ac.cn (P. G.); z\_xp1412@163.com (X.-P.Z.); xdxu@implad.ac.cn (X.-D.X.)

\*Correspondence authors. Address: Institute of Medicinal Plant Development, Chinese Academy of Medical Sciences & Peking Union Medical College, No. 151, Malianwa North Road, Haidian District, Beijing 100193, PR China. Tel: +86-010-57833296; Fax: +86-010-57833296.

E-mail addresses: [xdxu@implad.ac.cn](mailto:xdxu@implad.ac.cn) (Xudong Xu), [pguo@implad.ac.cn](mailto:pguo@implad.ac.cn) (Guo Peng).

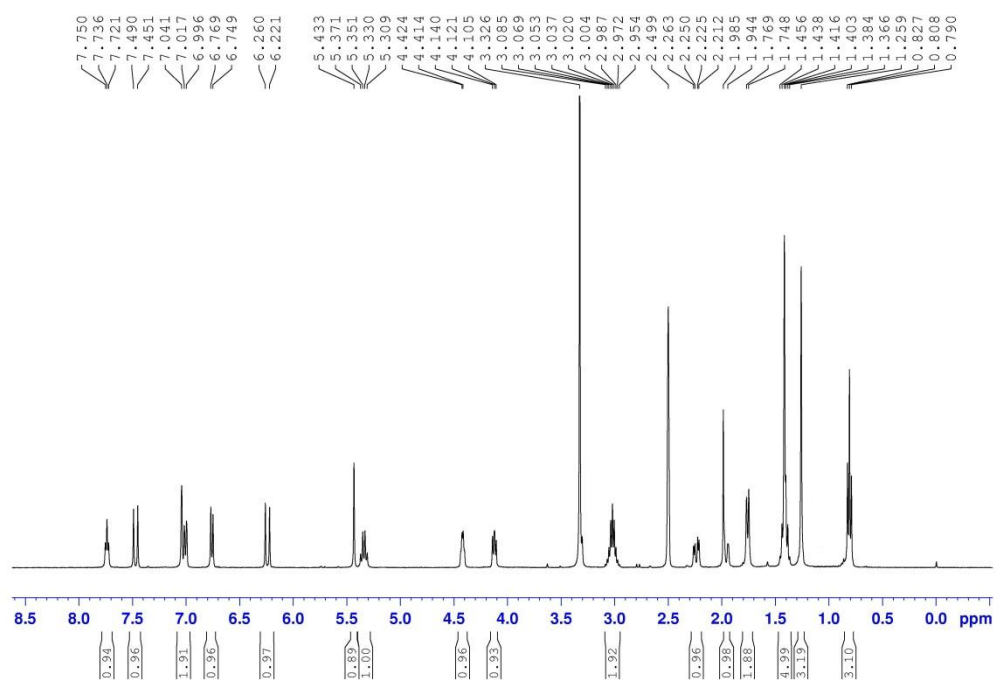

$^1\text{H}$  NMR of compound **3a**

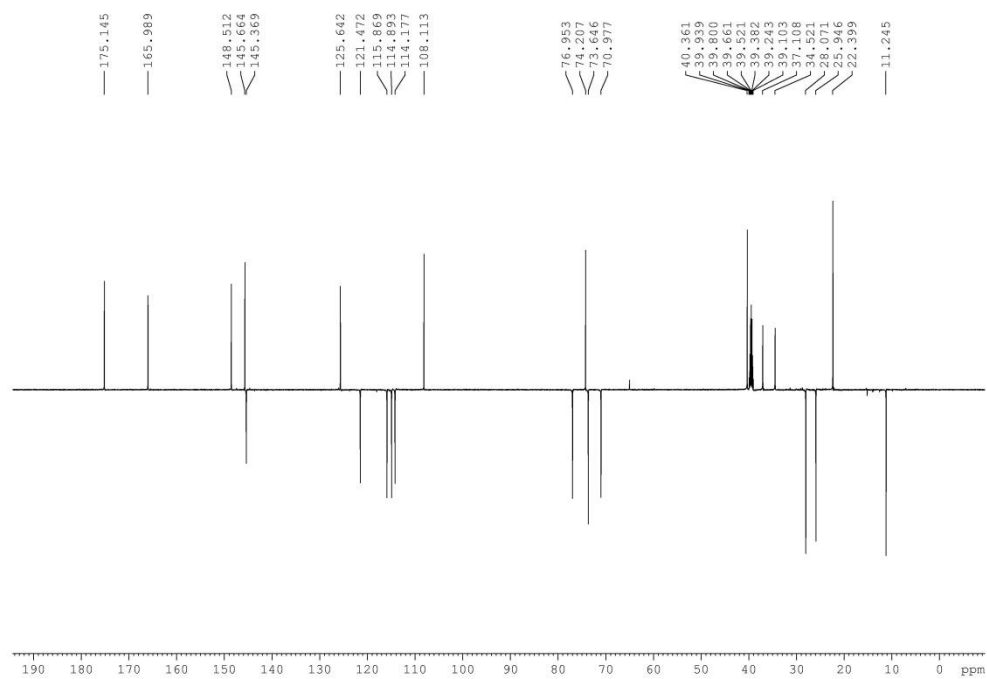

$^{13}\text{C}$  NMR of compound **3a**

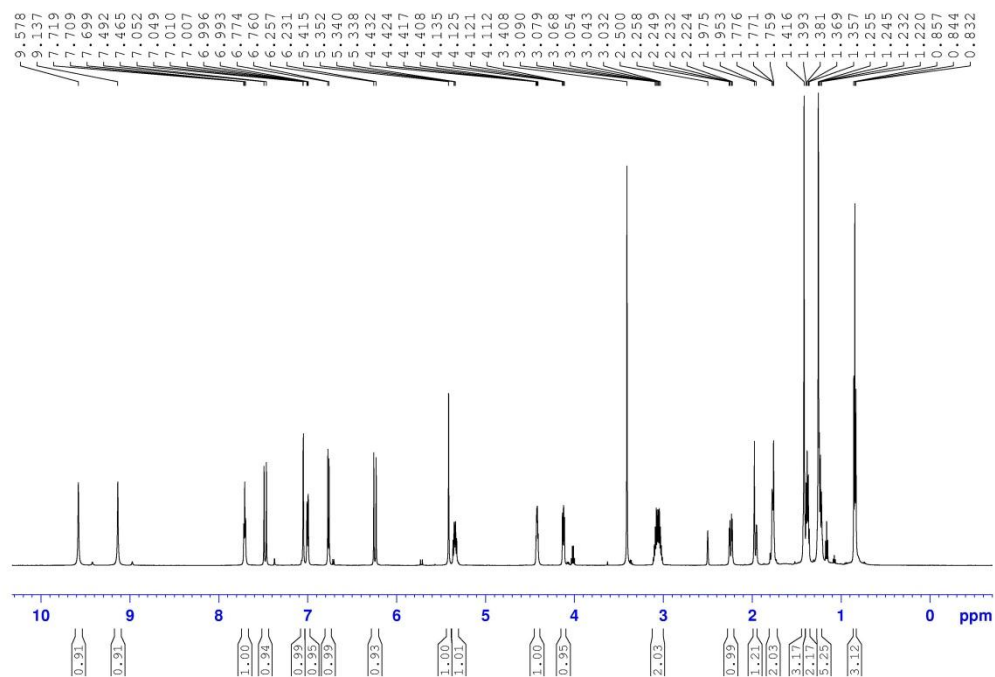

**<sup>1</sup>H NMR of compound 3b**

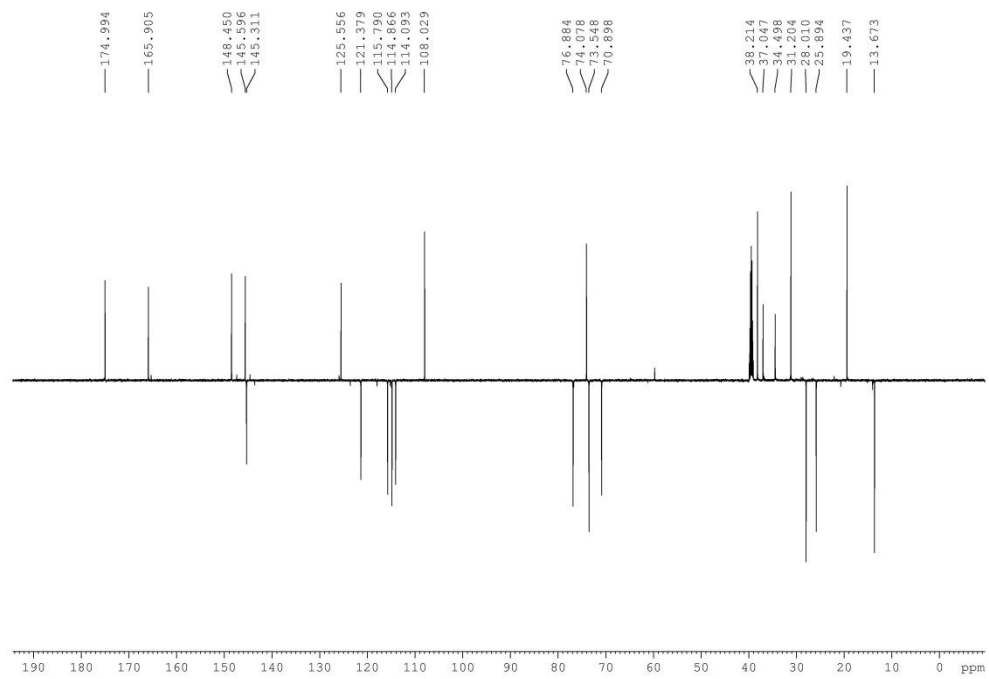

**<sup>13</sup>C NMR of compound 3b**

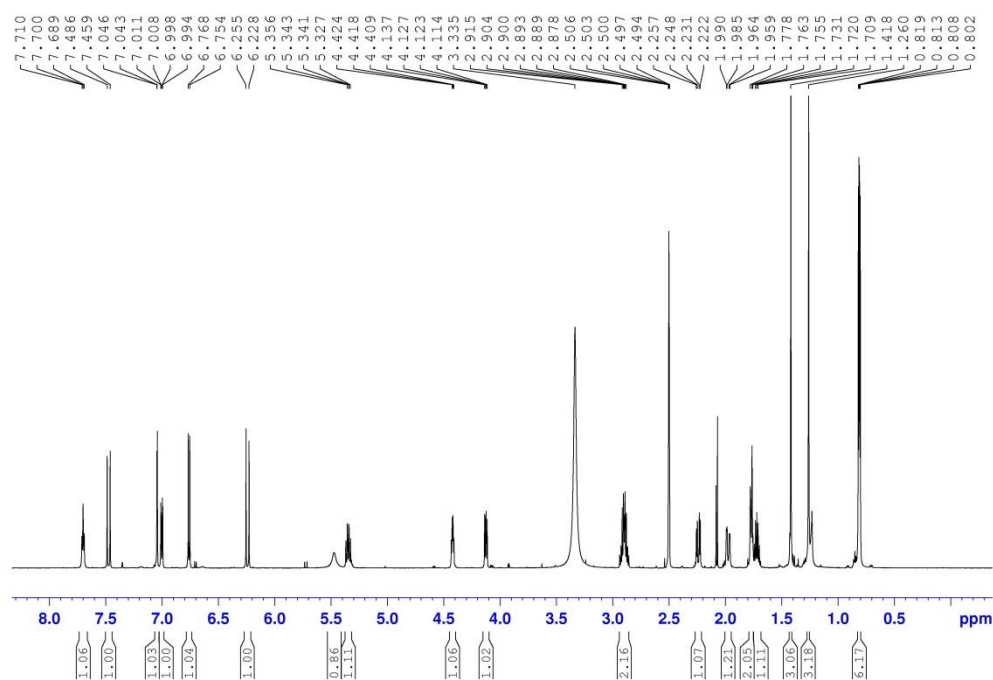

<sup>1</sup>H NMR of compound 3c

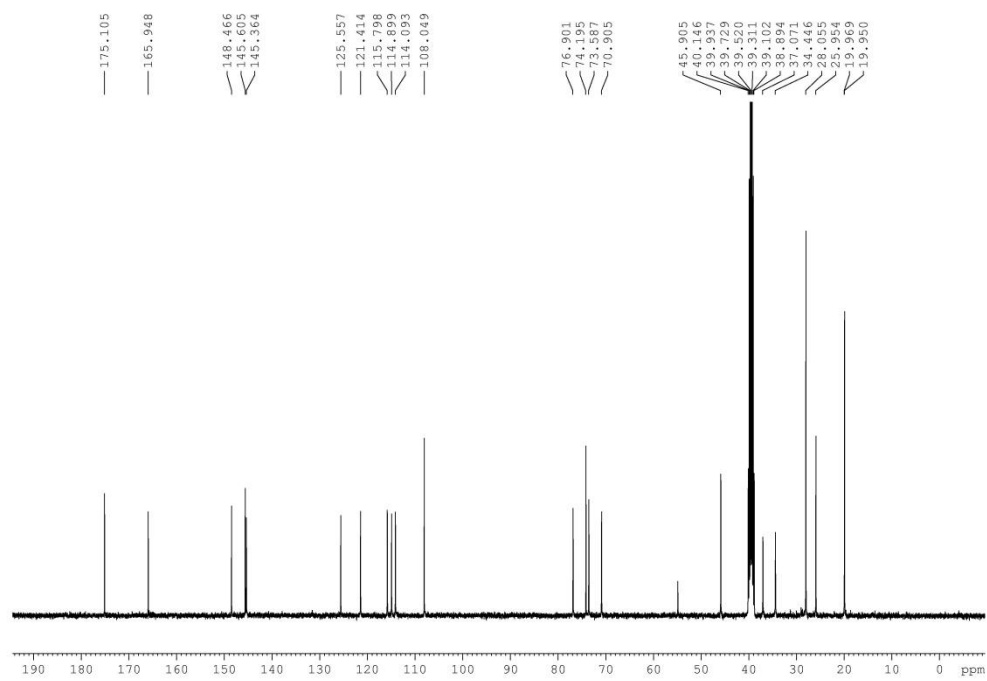

<sup>13</sup>C NMR of compound 3c

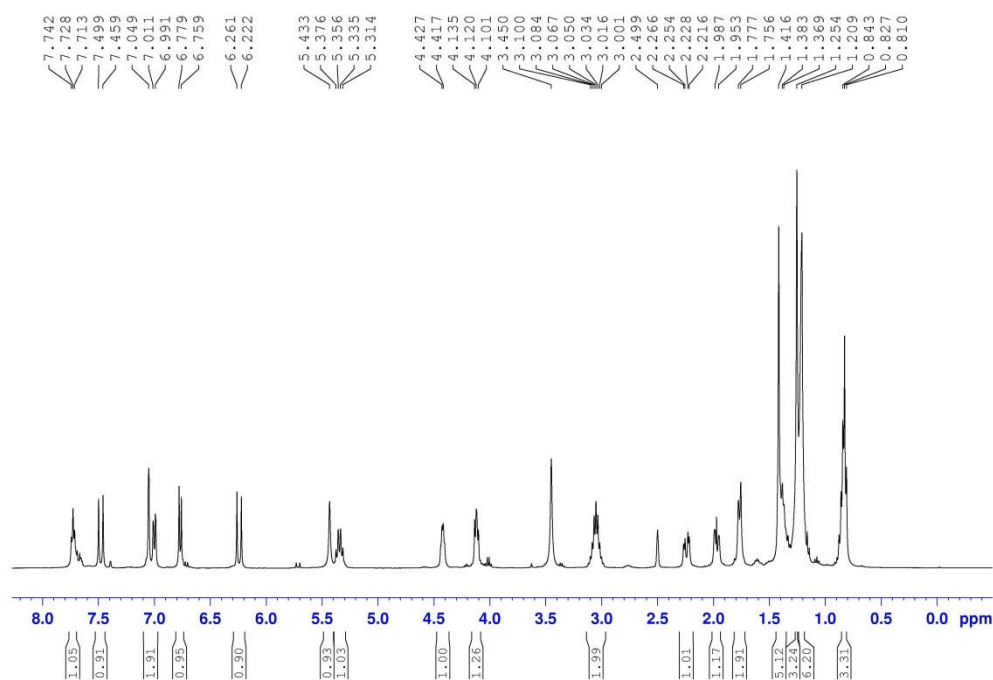

$^1\text{H}$  NMR of compound **3d**

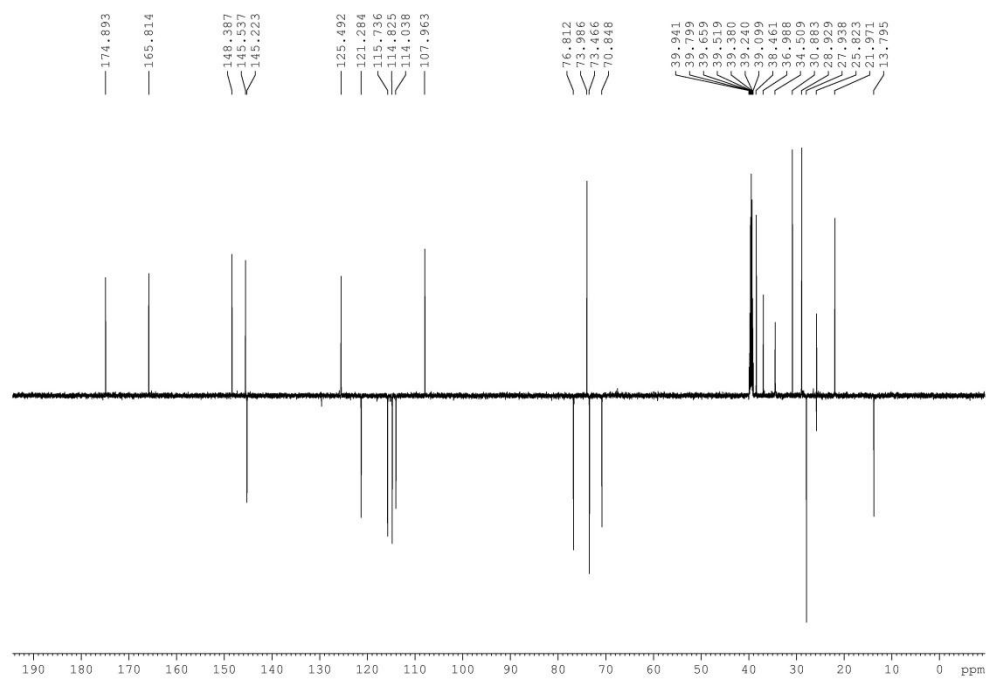

$^{13}\text{C}$  NMR of compound **3d**

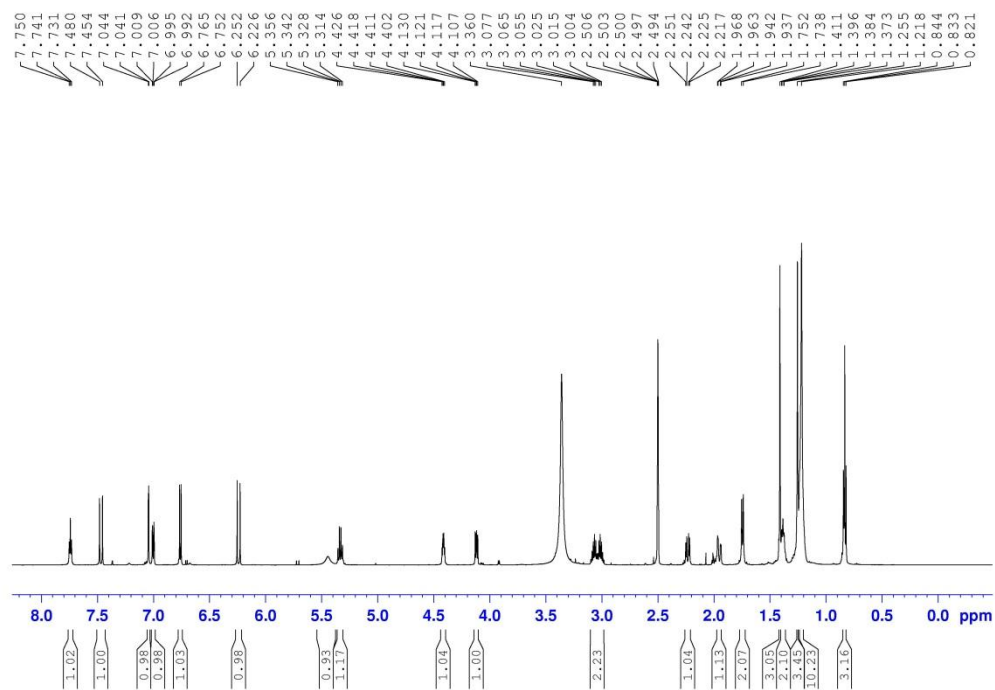

$^1\text{H}$  NMR of compound **3e**

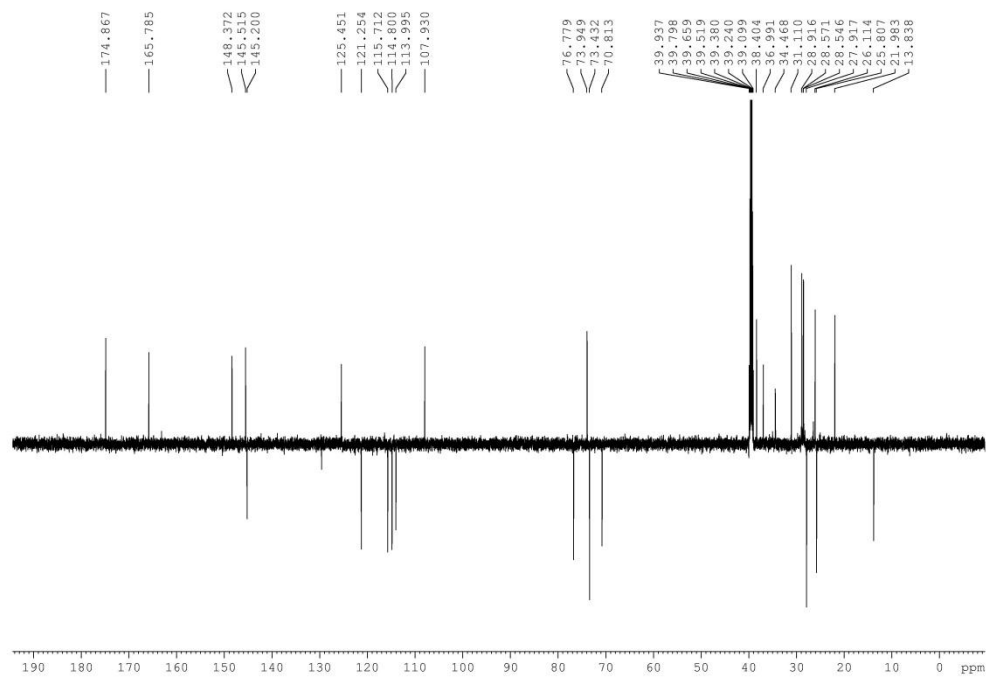

$^{13}\text{C}$  NMR of compound **3e**

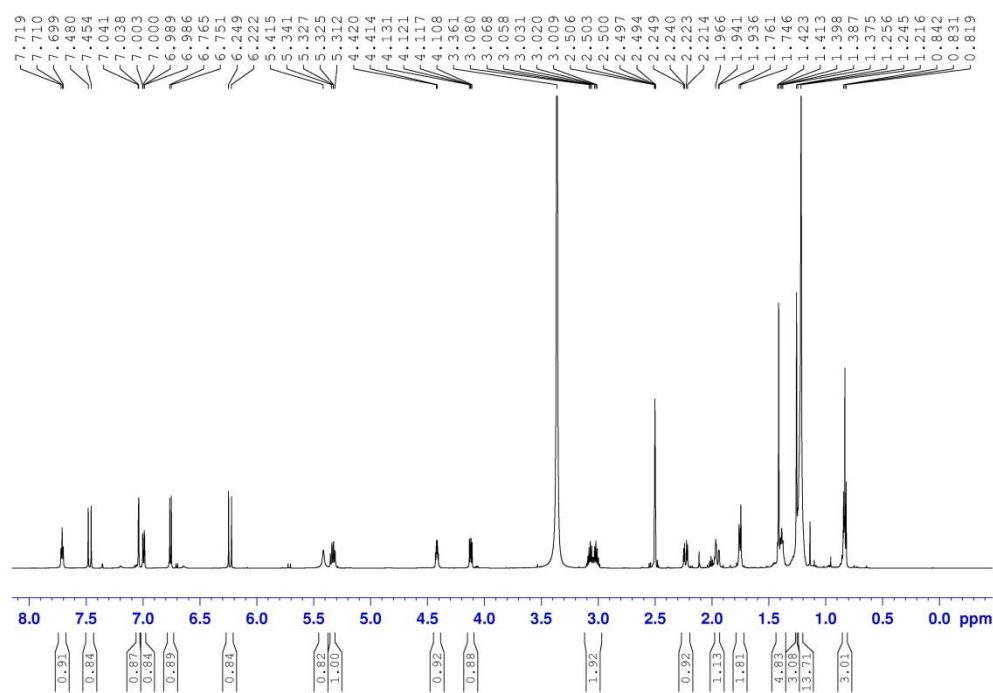

$^1\text{H}$  NMR of compound **3f**

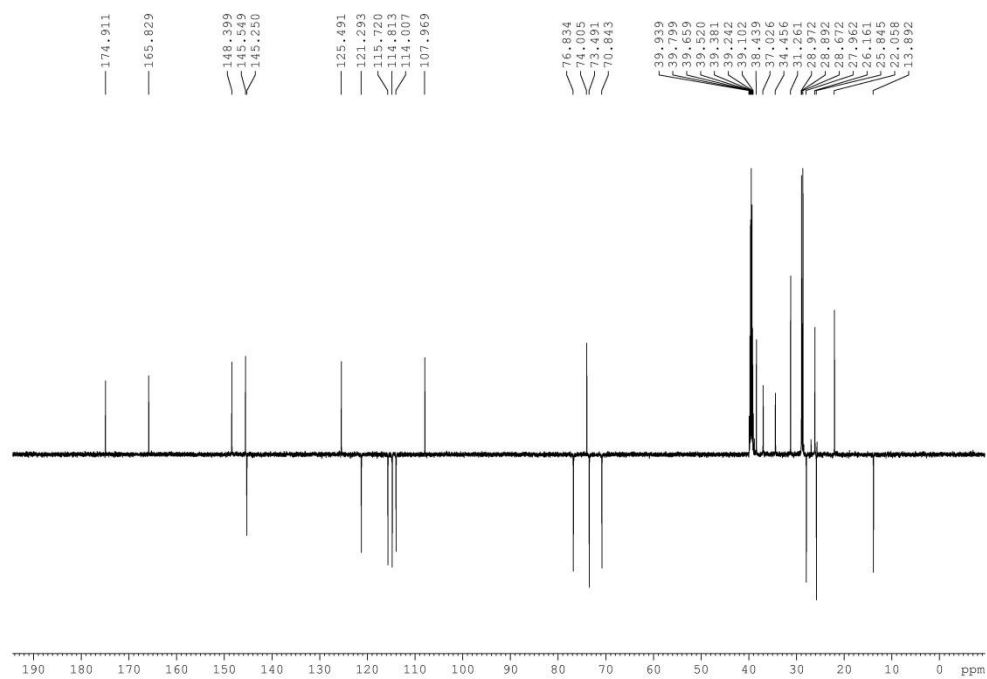

$^{13}\text{C}$  NMR of compound **3f**

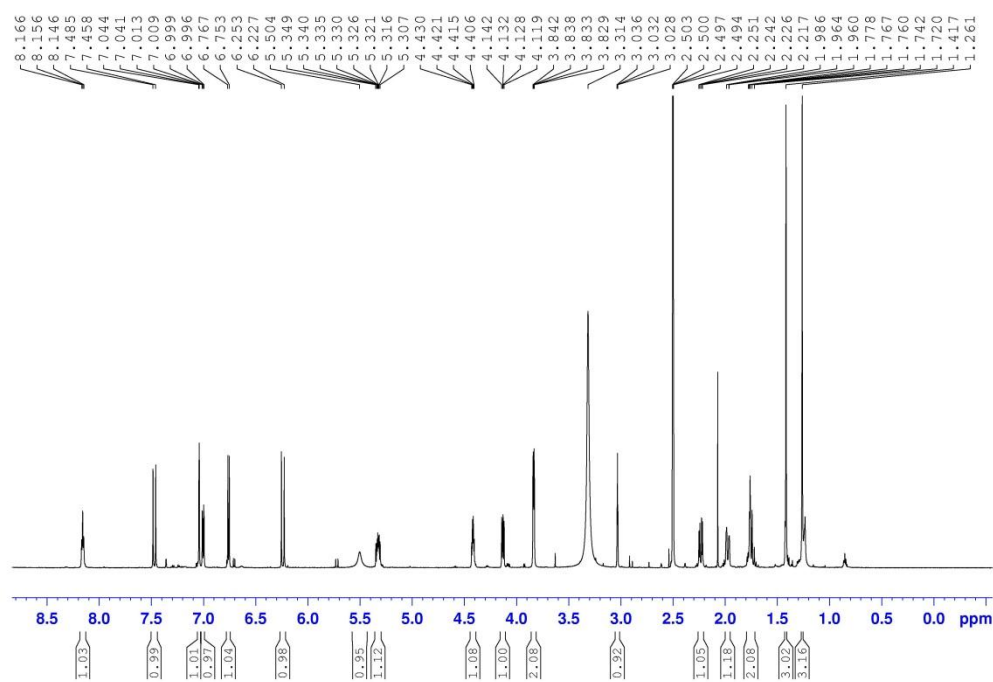

$^1\text{H}$  NMR of compound **3g**

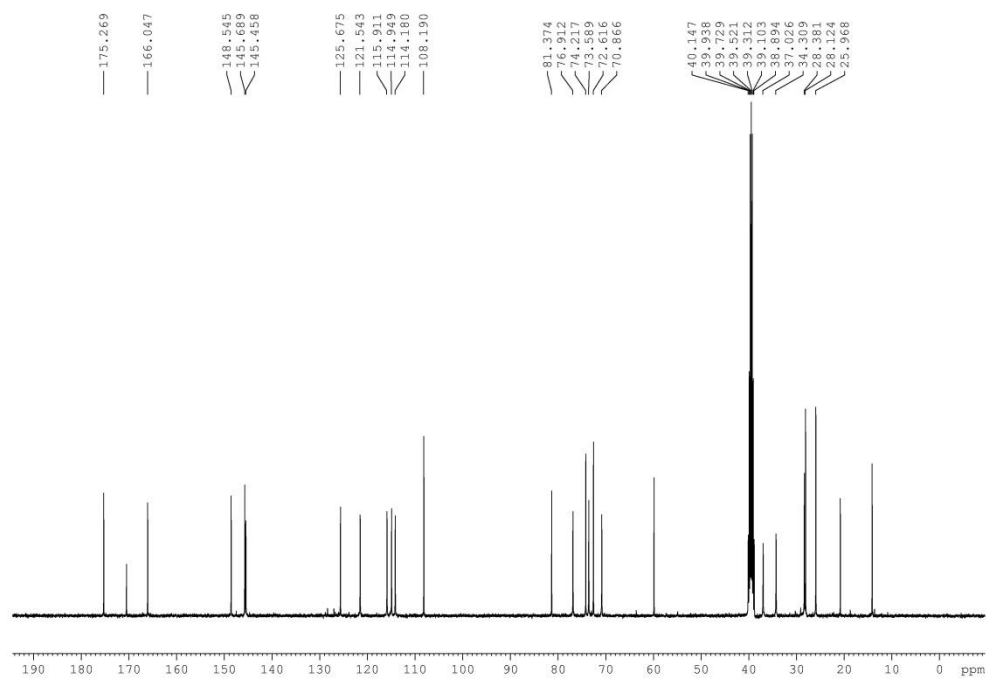

$^{13}\text{C}$  NMR of compound **3g**



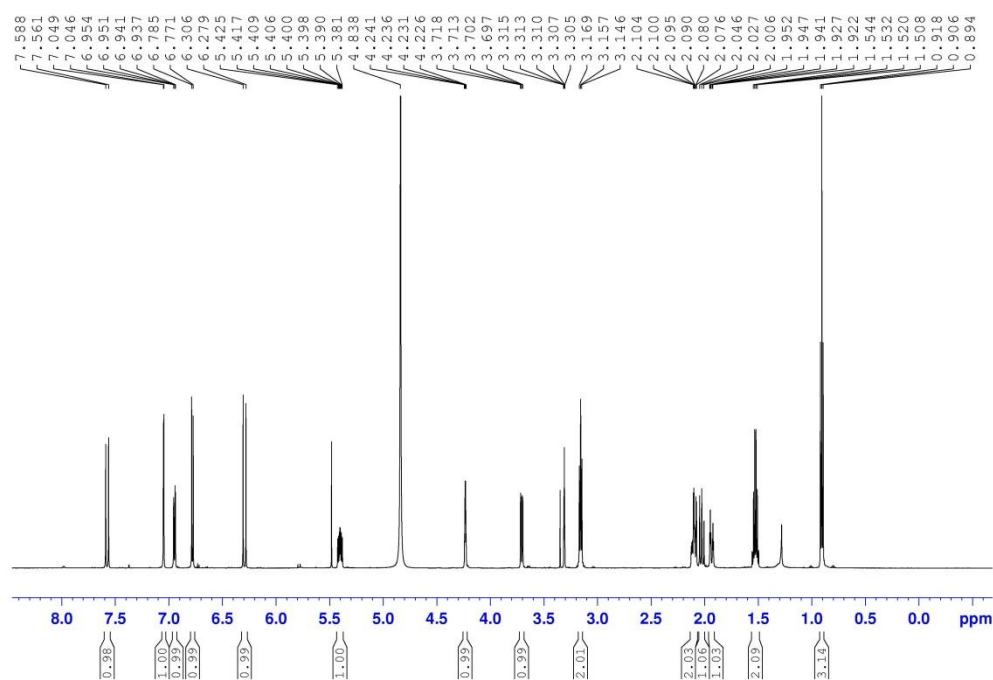

<sup>1</sup>H NMR of compound **4a**

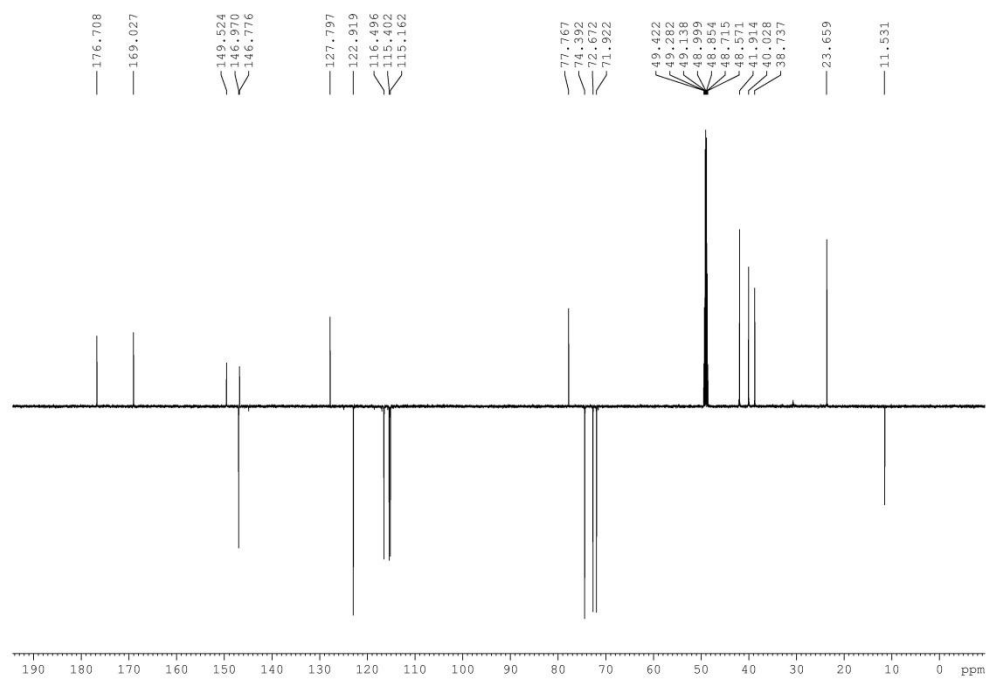

<sup>13</sup>C NMR of compound **4a**

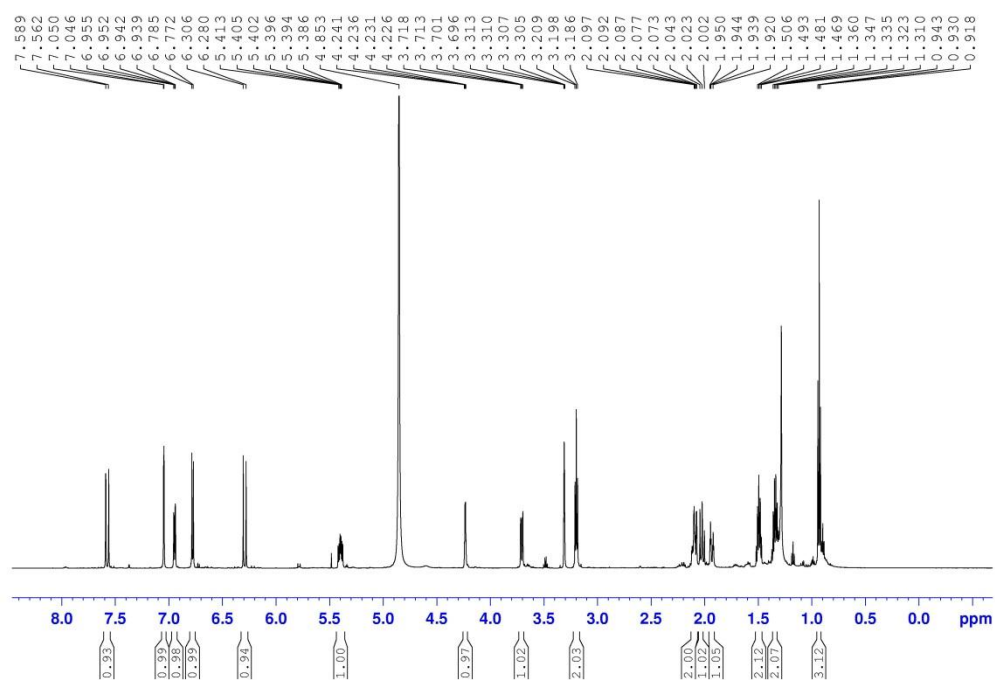

$^1\text{H}$  NMR of compound **4b**

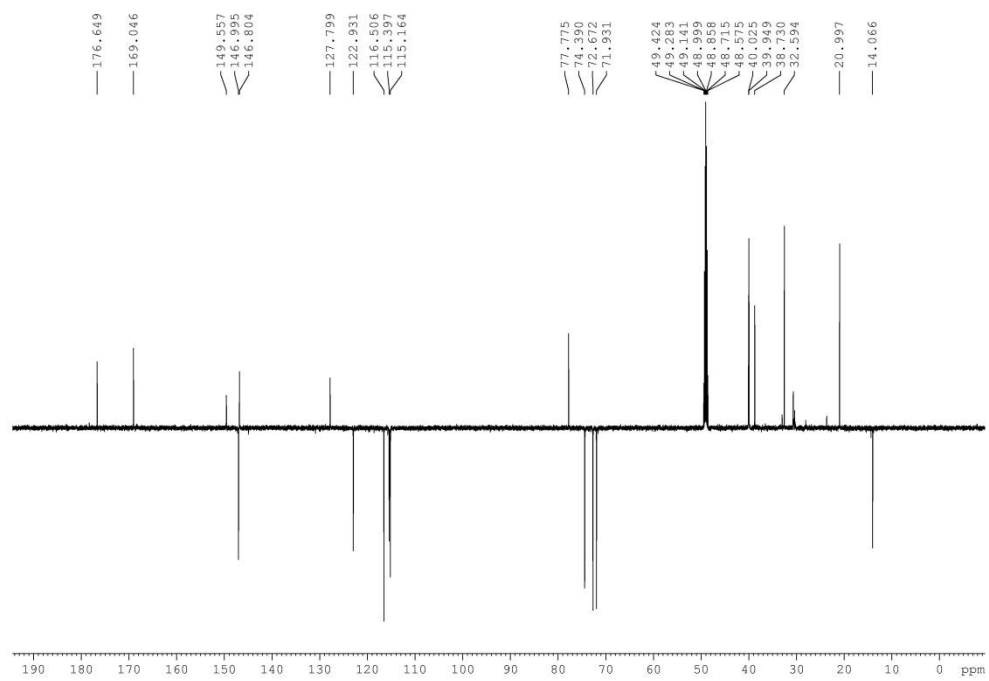

$^{13}\text{C}$  NMR of compound **4b**

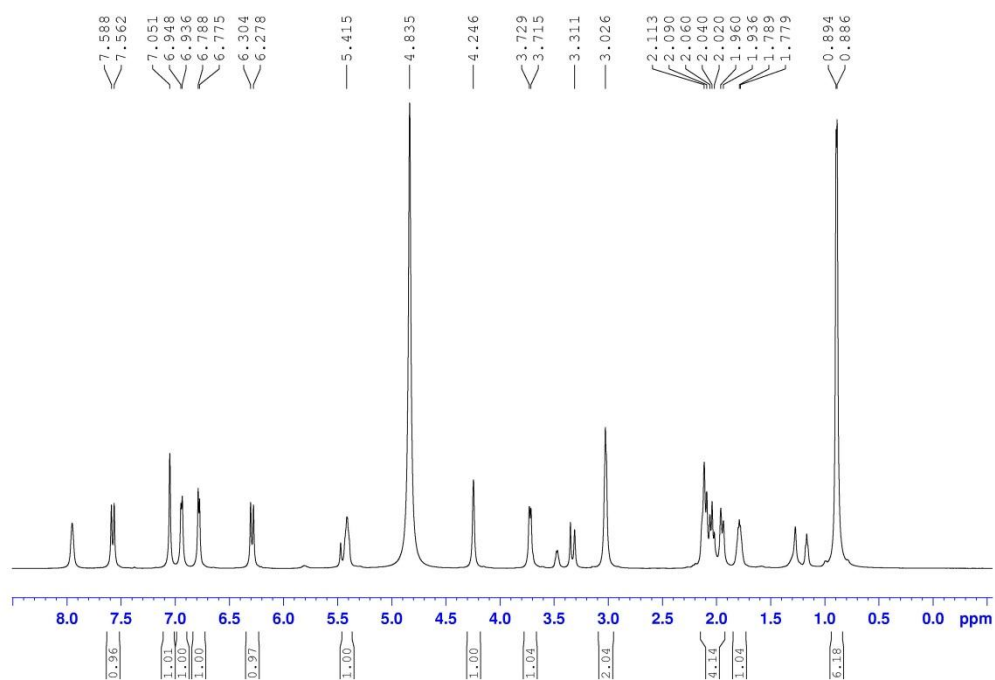

$^1\text{H}$  NMR of compound **4c**

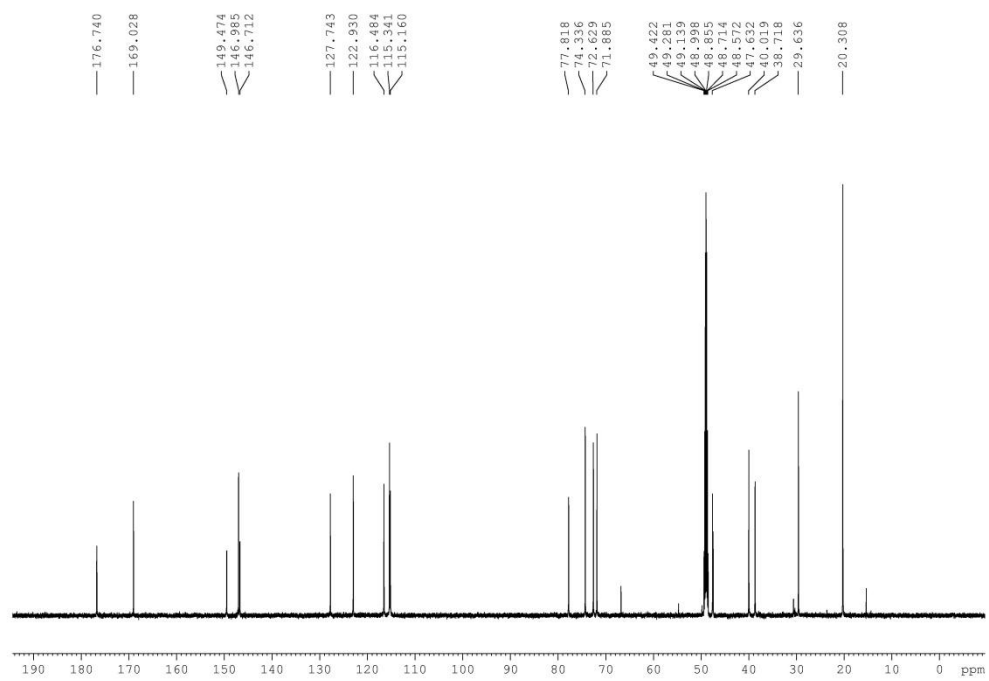

$^{13}\text{C}$  NMR of compound **4c**

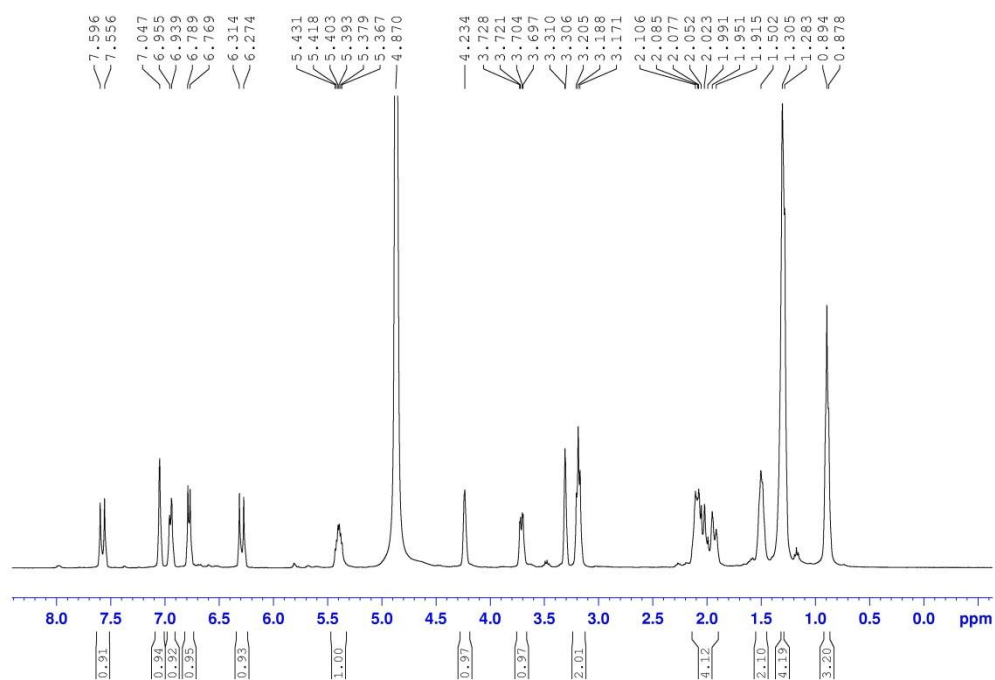

$^1\text{H}$  NMR of compound **4d**

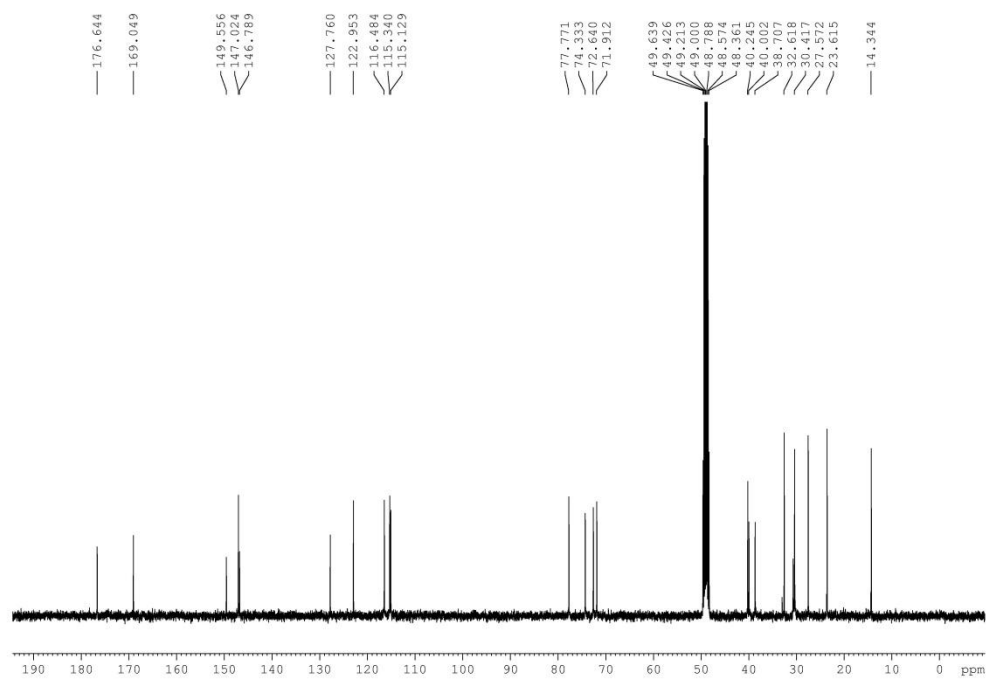

$^{13}\text{C}$  NMR of compound **4d**

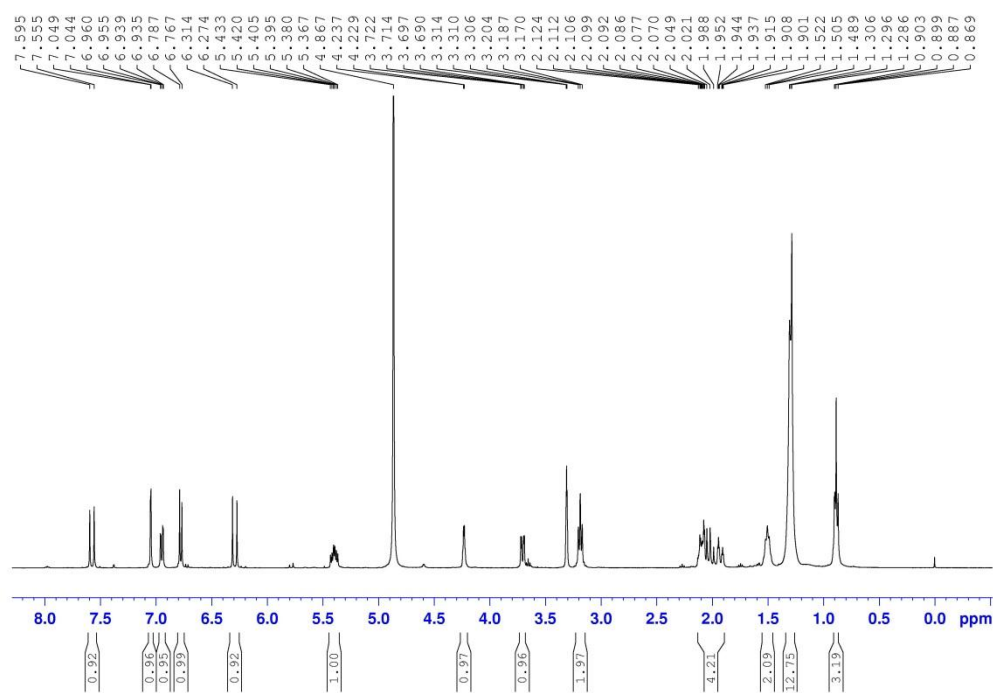

$^1\text{H}$  NMR of compound **4e**

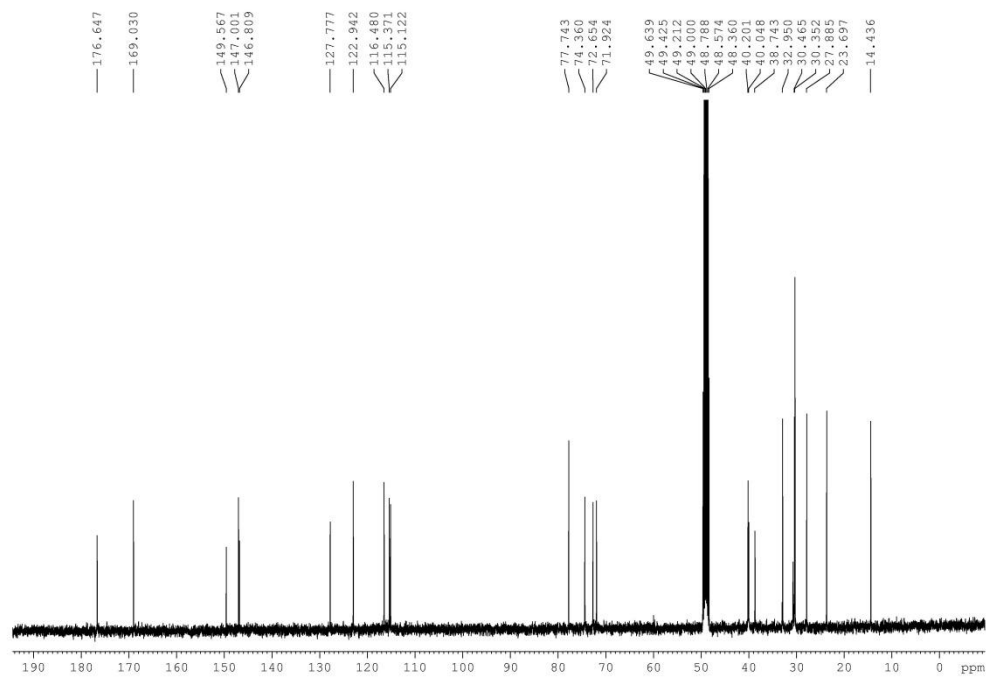

$^{13}\text{C}$  NMR of compound **4e**

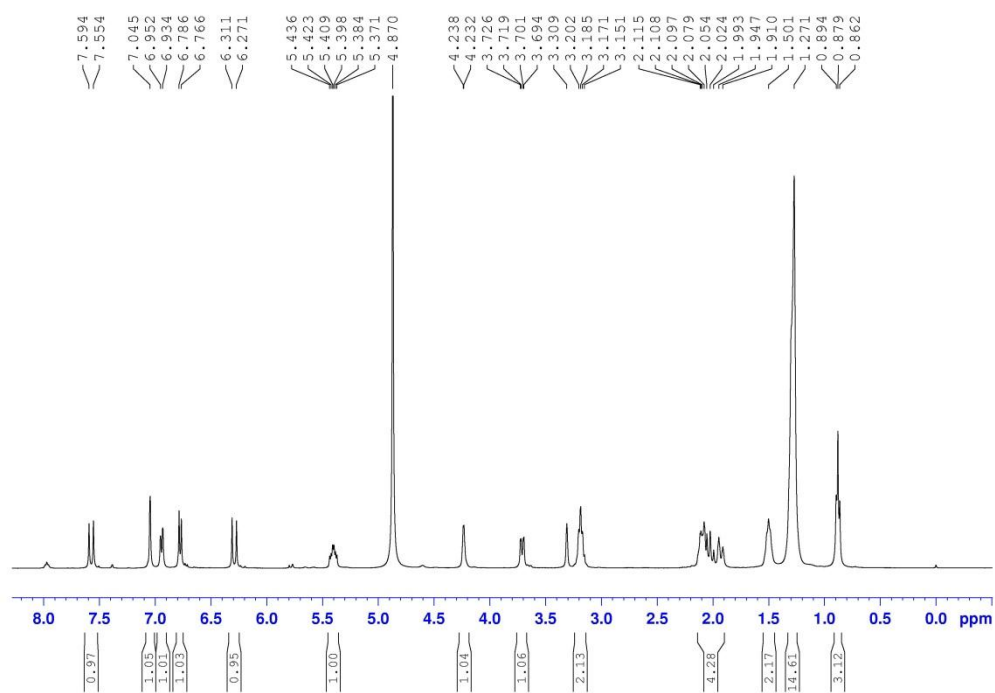

<sup>1</sup>H NMR of compound **4f**

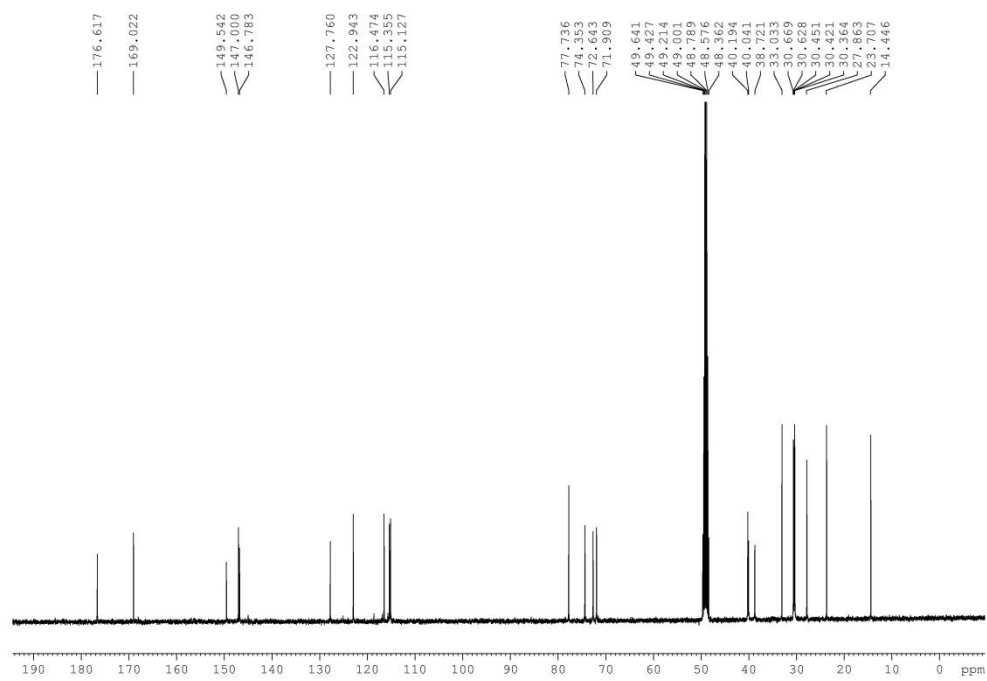

<sup>13</sup>C NMR of compound **4f**

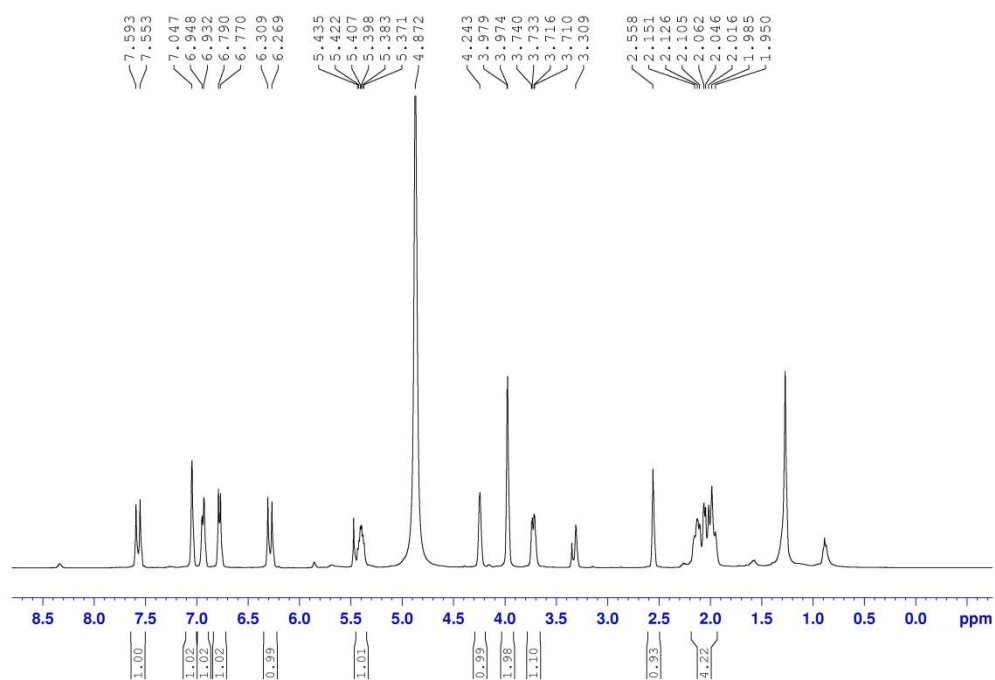

$^1\text{H}$  NMR of compound **4g**

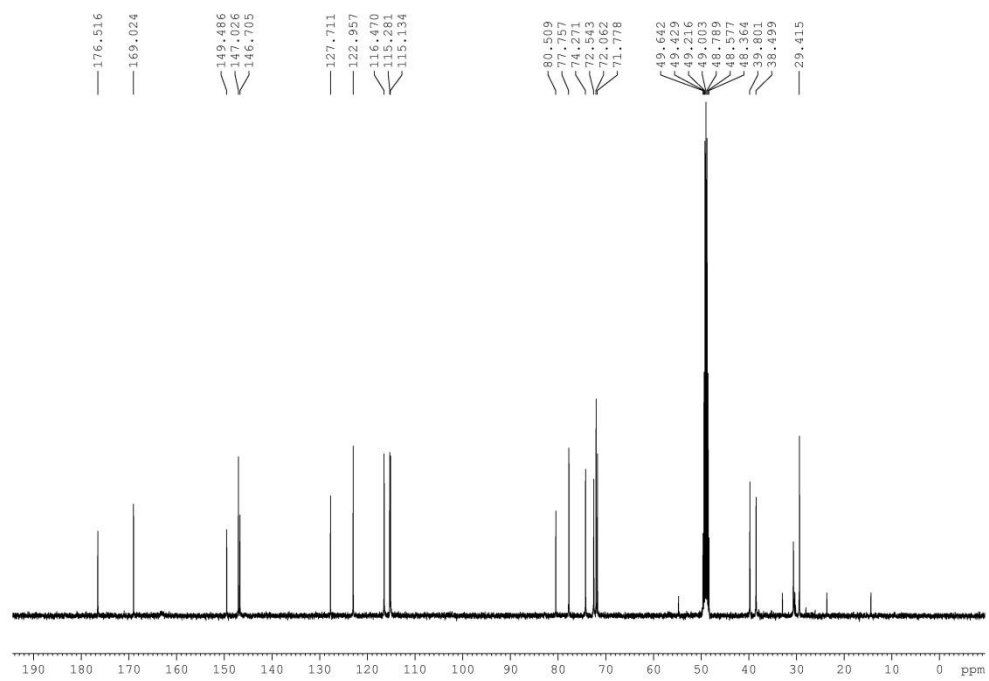

$^{13}\text{C}$  NMR of compound **4g**

HC-BM-16-ftms\_140709091138 #1 RT: 0.01 AV: 1 NL: 2.32E8  
T: FTMS + p ESI Full ms [200.00-1500.00]

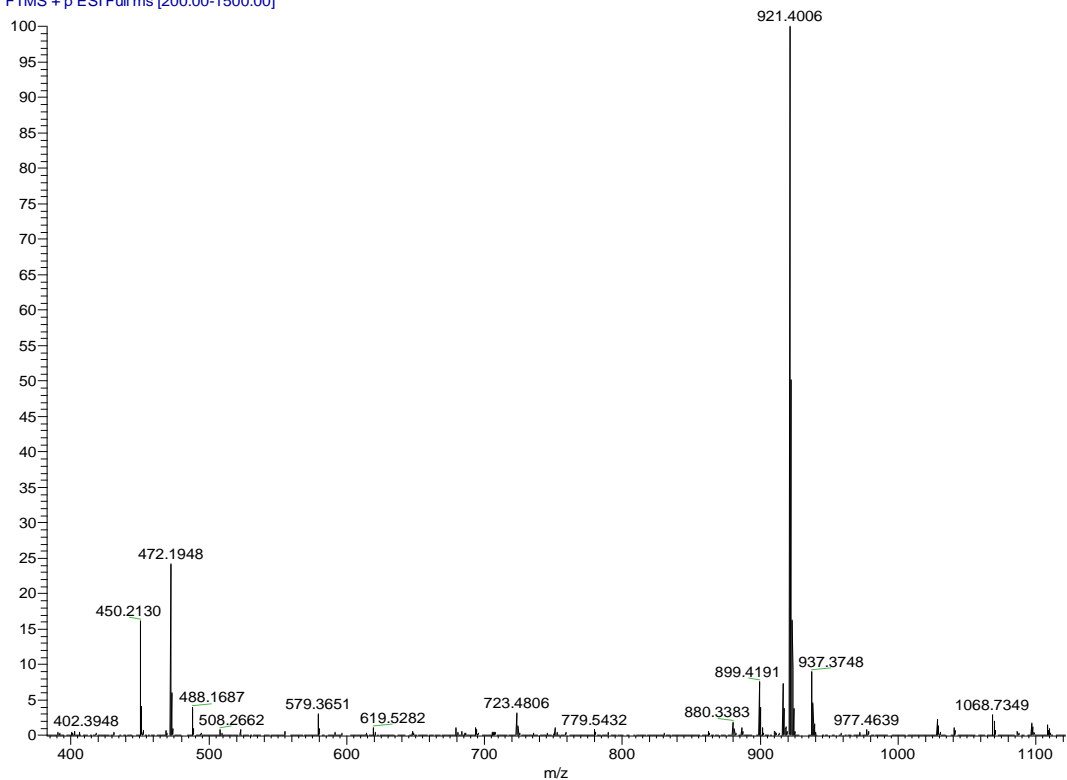

HRMS of compound 3a

HC-BM-14-ftms\_140709091138 #1 RT: 0.01 AV: 1 NL: 4.36E8  
T: FTMS + p ESI Full ms [200.00-1500.00]

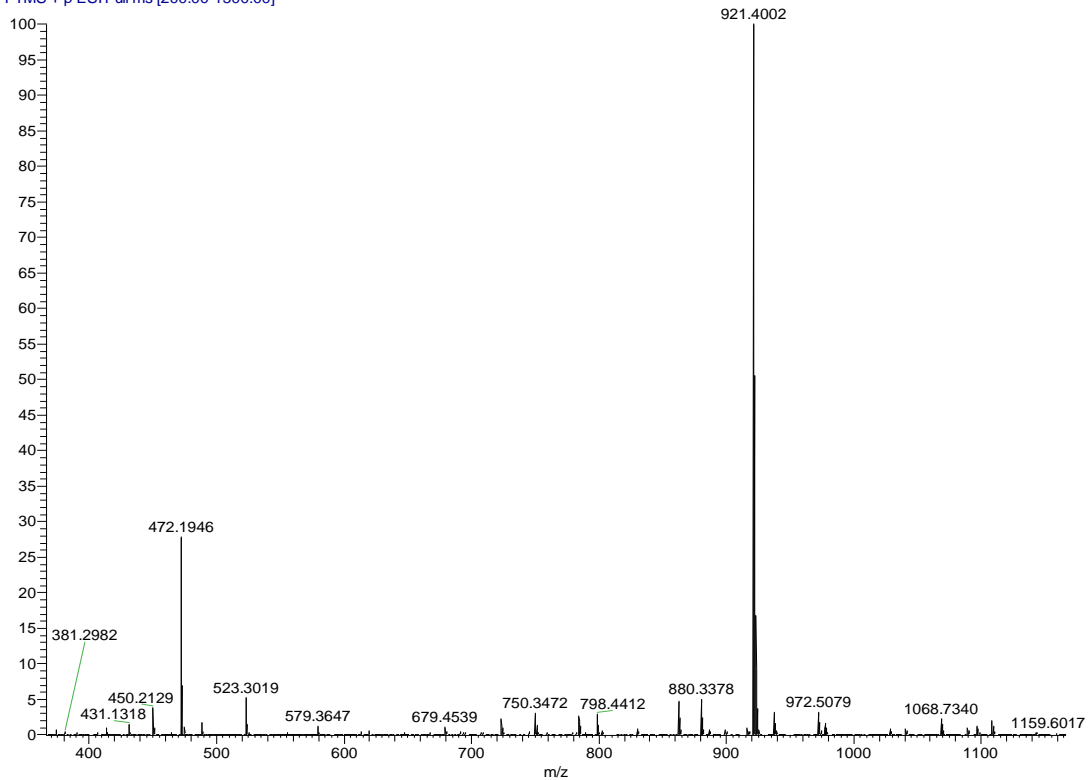

HRMS of compound 3b



HC-BM-13-ftms\_140709091138 #1 RT: 0.01 AV: 1 NL: 2.01E8  
T: FTMS + p ESI Full ms [200.00-1500.00]

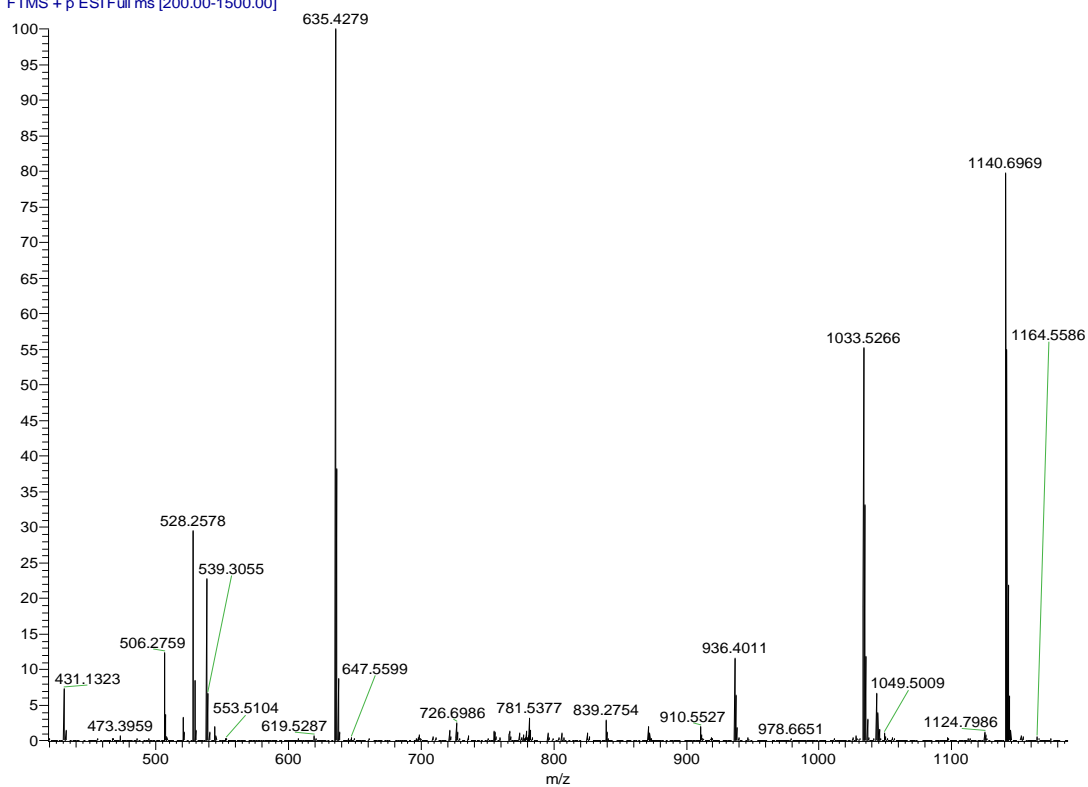

HRMS of compound **3c**

HC-BM-11-ftms\_140709091138 #1 RT: 0.01 AV: 1 NL: 2.25E8  
T: FTMS + p ESI Full ms [200.00-1500.00]

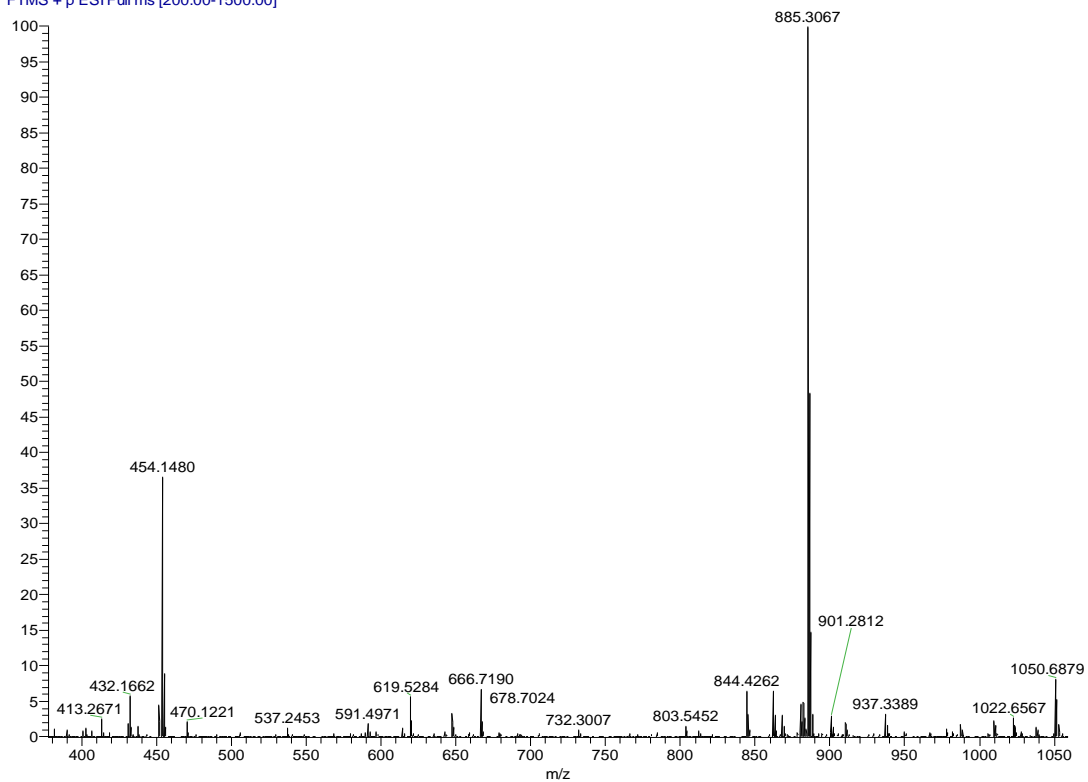

HRMS of compound **3d**

HC-BM-3-fms\_140709091138 #1 RT: 0.01 AV: 1 NL: 5.14E7  
T: FTMS + p ESI Full ms [200.00-1500.00]

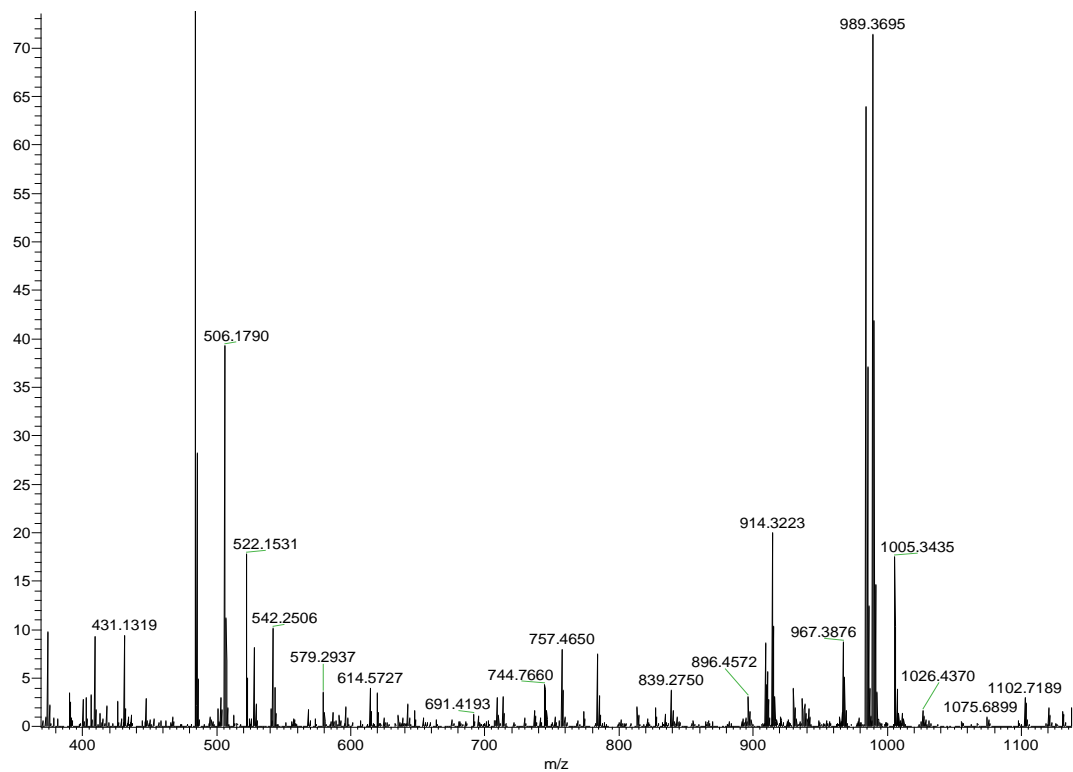

HRMS of compound 3e

HC-BM-9-fms\_140709091138 #1 RT: 0.01 AV: 1 NL: 1.39E8  
T: FTMS + p ESI Full ms [200.00-1500.00]

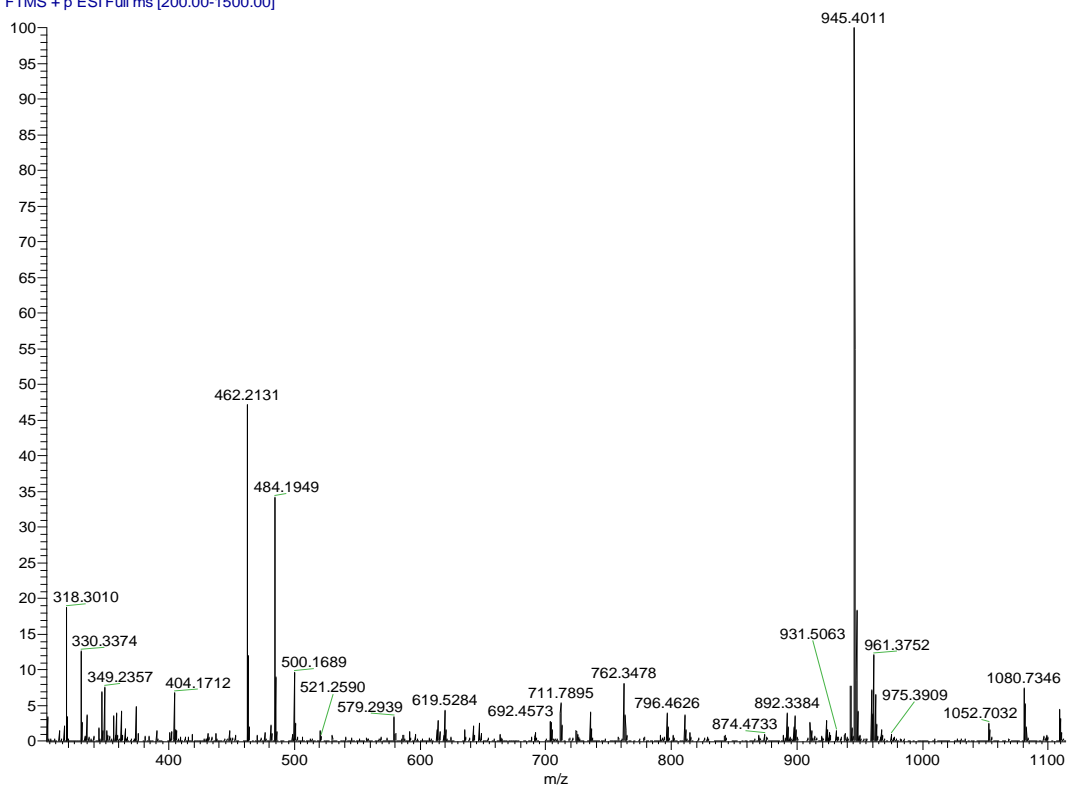

HRMS of compound 3f

HC-BM-5-ftms\_140709091138 #1 RT: 0.01 AV: 1 NL: 2.18E8  
T: FTMS + p ESI Full ms [200.00-1500.00]

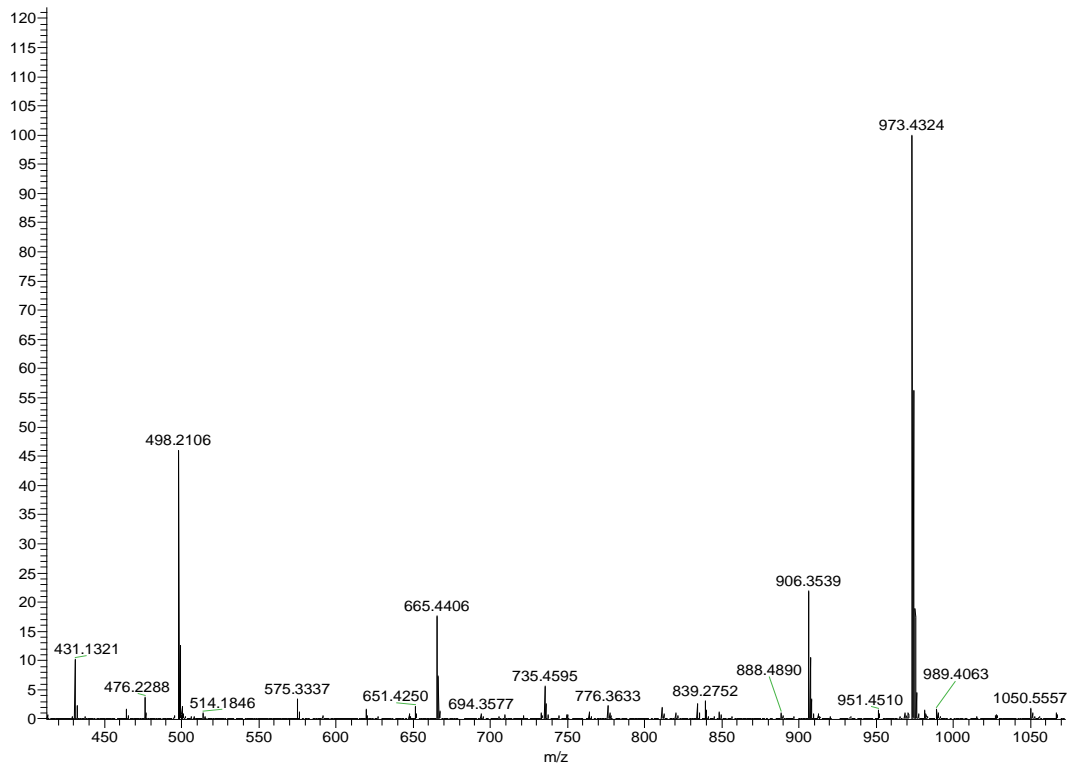

HRMS of compound 3g

HC-BM-B-16-FTMS\_140711085832 #1 RT: 0.01 AV: 1 NL: 2.18E6  
T: FTMS + p ESI Full ms [150.00-1000.00]

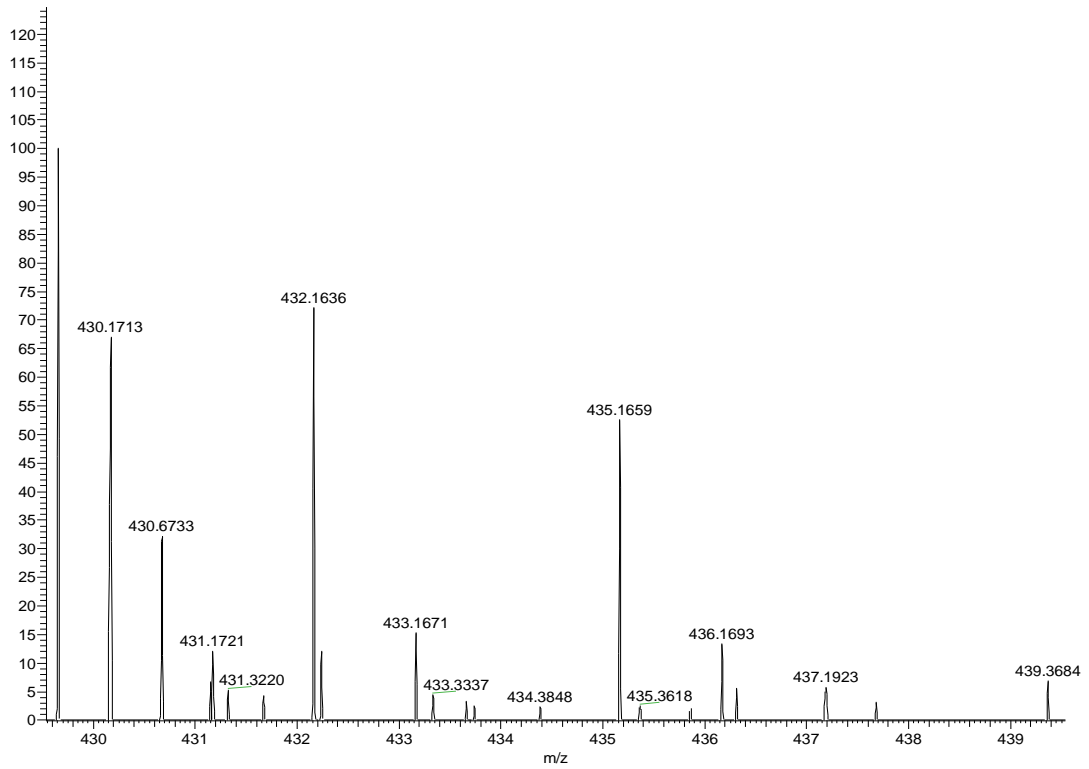

HRMS of compound 4a

HC-B-14-fms\_140709113742 #1 RT: 0.00 AV: 1 NL: 2.00E7  
T: FTMS + p ESI Full ms [200.00-1500.00]

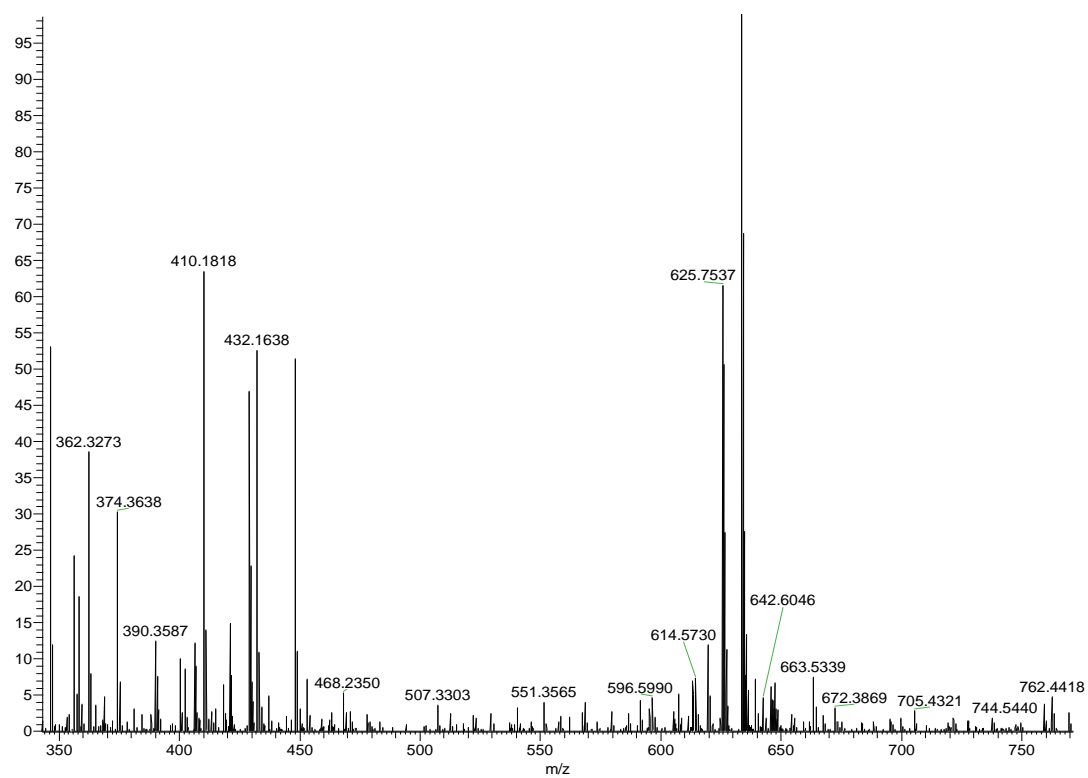

HRMS of compound 4b

HC-B-13-1-f\_140709113742 #1 RT: 0.01 AV: 1 NL: 1.65E5  
T: FTMS + p ESI Full ms [200.00-1500.00]

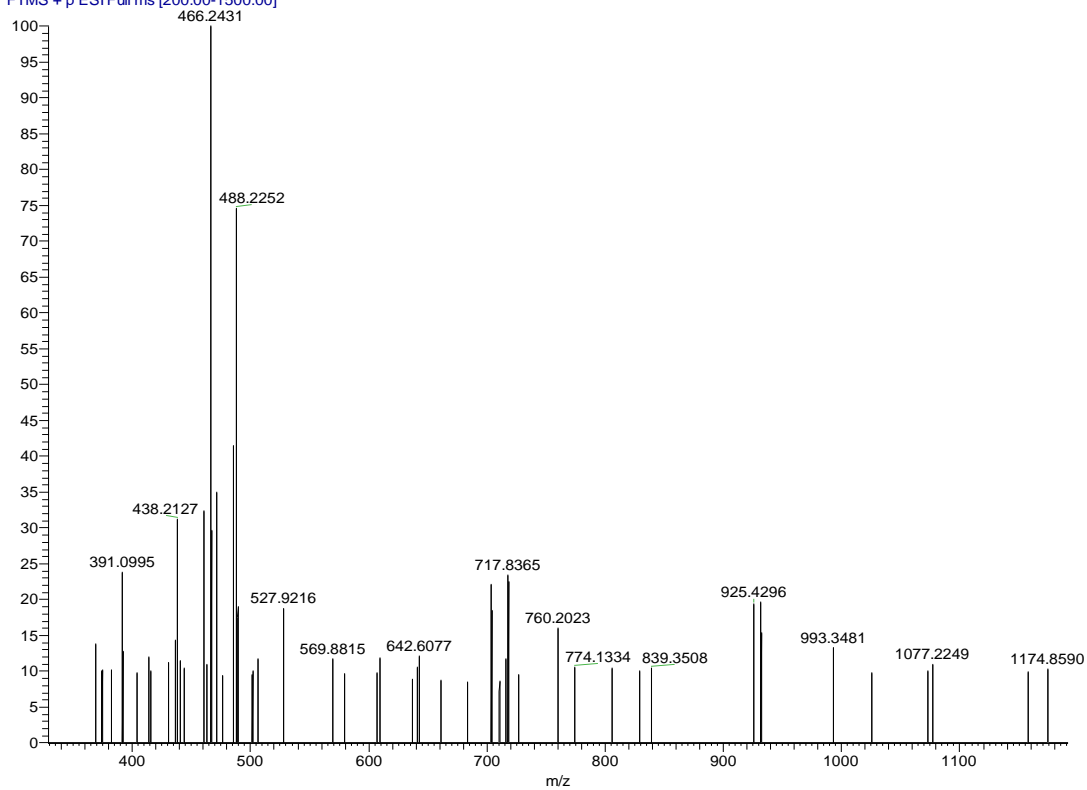

HRMS of compound 4c

HC-B-11-fms\_140709091138 #1 RT: 0.01 AV: 1 NL: 8.80E6  
T: FTMS + p ESI Full ms [200.00-1500.00]

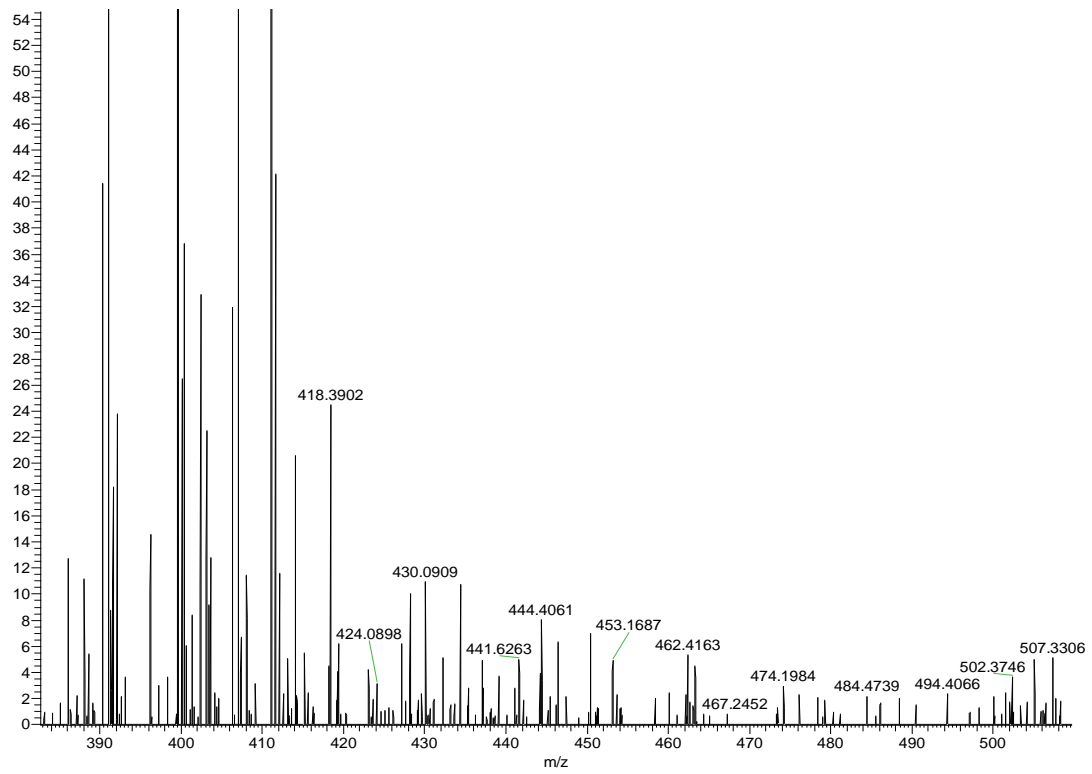

HRMS of compound **4d**

HC-B-3-1-fms\_140709135657 #1 RT: 0.00 AV: 1 NL: 4.72E7  
T: FTMS + p ESI Full ms [200.00-1500.00]

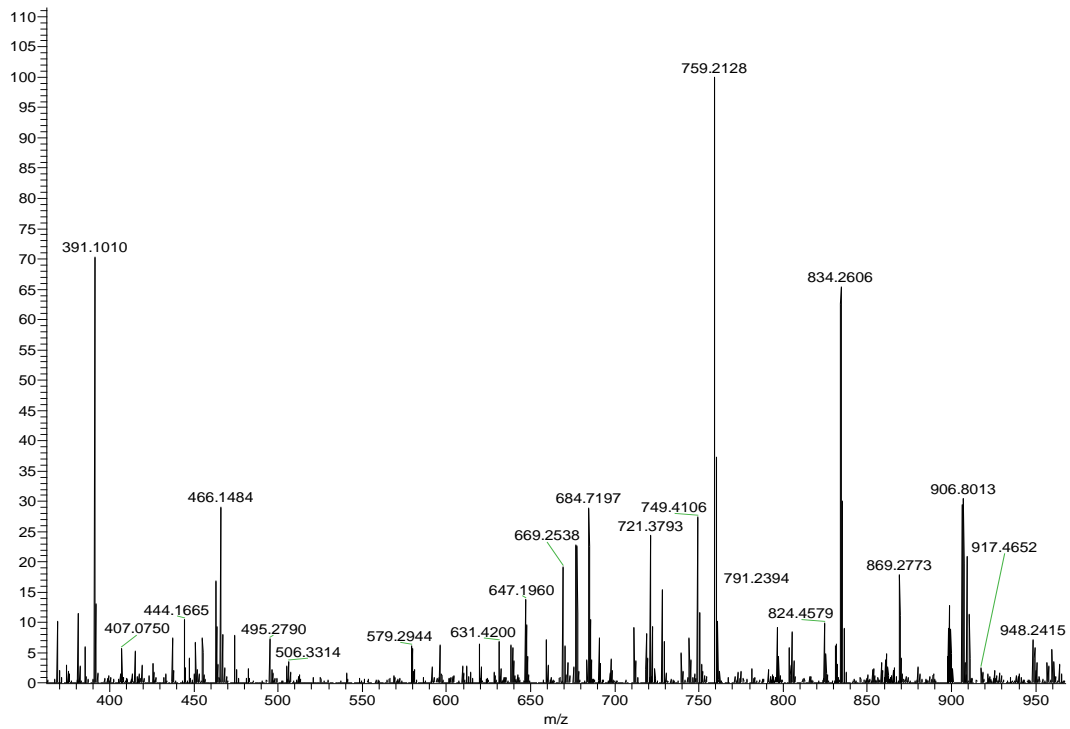

HRMS of compound **4e**

HC-B-9-ftms\_140709091138 #1 RT: 0.01 AV: 1 NL: 3.34E7  
T: FTMS + p ESI Full ms [200.00-1500.00]

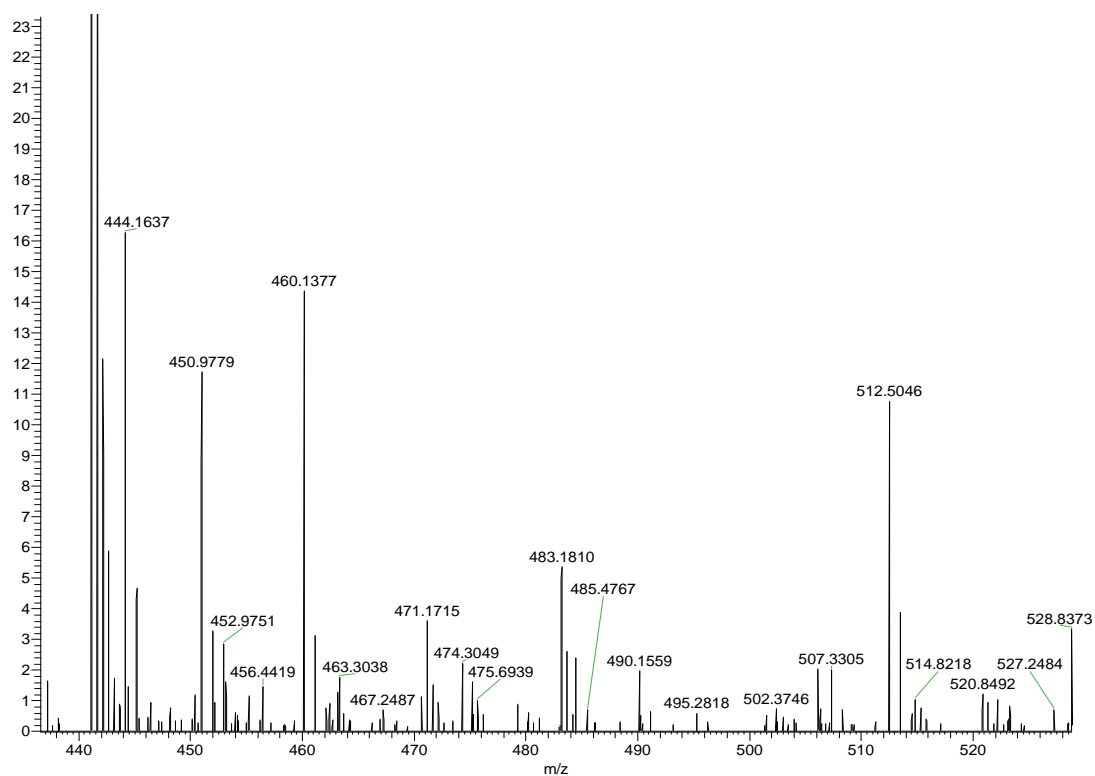

HRMS of compound 4f

HC-B-5-ftms\_140709091138 #1 RT: 0.01 AV: 1 NL: 1.38E7  
T: FTMS + p ESI Full ms [200.00-1500.00]

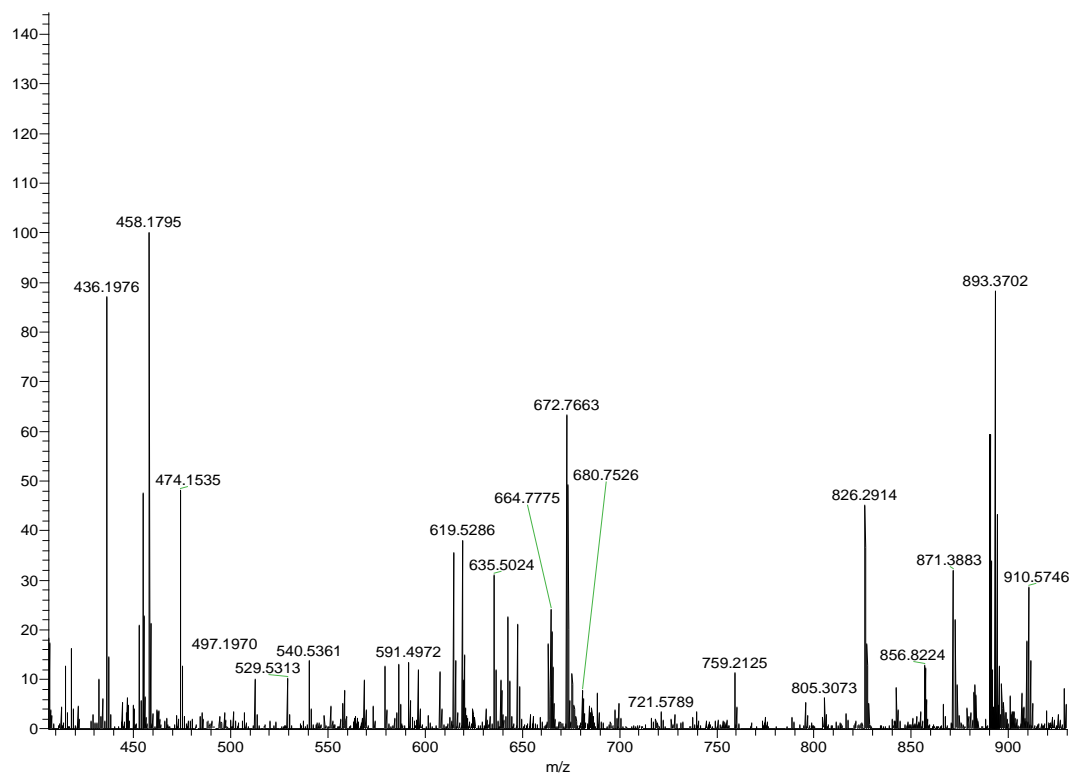

HRMS of compound 4g
